# Supplementary material for: Comprehensive Analysis of the Palindromic Motif TCTCGCGAGA: A Regulatory Element of the HNRNPK Promoter
Source: PubMed Central journal article supplement — DNA Res. 2010 Jun 29;17(4):245–60. doi: 10.1093/dnares/dsq016 (PMC2920758; doi:10.1093/dnares/dsq016), 2010-06-29
Supplement: dsq016_1.pdf [file dsq016_1.pdf]

## **Comprehensive analysis of the palindromic motif TCTCGCGAGA, a regulatory element of the *HNRNPK* promoter**

Michal Mikula, Pawel Gaj, Karolina Dzwonek, Tymon Rubel, Jakub Karczmariski, Agnieszka Paziewska, Artur Dzwonek, Piotr Bragoszewski, Michal Dadlez, Jerzy Ostrowski

### **SUPPLEMENTARY DATA**

#### **Supplementary method 1**

The maximum mass deviation (MMD) for precursor and fragment ions were established in a procedure involving two database searches separated by a mass recalibration step. Data from each LC-MS/MS run was searched in a first pass with permissive MMD settings ( $\pm 40$  ppm for precursor ions and  $\pm 0.8$  Da for fragment ions). The resulting Mascot DAT files were next imported to an in-house Java tool (DATViewer, <http://www.ire.pw.edu.pl/~trubel/soft/ms/mascotscan>) which implements a procedure for systematic mass errors elimination and high accuracy MMD estimation. Only PSMs with a score value exceeding the smaller of the Mascot identity and homology thresholds were used for the mass accuracy assessment. For each LC-MS/MS run the mass correction was performed by fitting a smooth LOESS curve to the scatterplot of the observed mass errors versus precursor ions masses. The obtained normalization function was then used for the entire set of precursor ions. A separate calibration function was also calculated for fragmentation spectra on the basis of the masses of singly charged  $y$ -series ions. The new MMD values were estimated as three-fold the standard deviation of the mass errors after recalibration. Finally, the mass-corrected spectra were exported as Mascot Generic File format files and resubmitted to the database search engine in order to obtain final peptide and protein identifications

## Supplementary method 2

For statistical assessment of peptide assignments the fragmentation spectra were matched against a joined target/decoy database.<sup>1</sup> The target part of the database containing true protein sequences was concatenated with a decoy part composed of reversed versions of these sequences. All peptide PSMs, from the forward and the reverse database, were sorted according to their score modified by subtracting the smaller of the Mascot identity and homology thresholds. The number of false positive identifications associated with a specific position  $P$  in the sorted list was estimated by doubling the number PSMs from the decoy part of the database at positions not greater than  $P$ . The position-related false discovery rate (FDR) was calculated by dividing the estimated number of false positives by the total number of PSMs at preceding positions. To address the fact that FDR itself is not a function of the underlying score (i.e. FDR can decrease with increasing position in the sorted list), the position-related FDRs were next converted to  $q$ -values, as described in.<sup>2</sup> The presented analysis was performed using a proprietary software tool implemented in Java programming language (MascotScan, <http://www.ire.pw.edu.pl/~trubel/soft/ms/mascotscan>).

1. Elias, J. E. and Gygi, S. P. 2007, Target-decoy search strategy for increased confidence in large-scale protein identifications by mass spectrometry. *Nature methods*, **4**, 207-214.
2. Kall, L., Storey, J. D., MacCoss, M. J. and Noble, W. S. 2008, Assigning significance to peptides identified by tandem mass spectrometry using decoy databases. *Journal of proteome research*, **7**, 29-34.

## Supplementary Tables.

Supplementary Table S1. Identified promoter areas of a human *HNRNPK* gene with marked regulatory elements.

P1 – promoter 1, P2 – promoter 2, P3 – promoter 3, P4 – promoter 4

**GCGG** – consensus Sp1 binding motif , **TCTCGCGAGA** – palindrome motif, **CGGGTTTT** - consensus NFkB binding motif , **CCAATC** – the CCAAT regulatory element, **CTCGATGGC** – the GATA regulatory element, **TGAGTCAGG** – consensus NF-E2 binding motif.

>Promoter1-chr9-85785301-85785800-rev (P1)

```
ACAAACAACGGGTTTCCGAAGCGTGGGCCCGGCCAGCGGACGCAGACGGCCCGCACTTACCGCGCCGAGCTCGTCCCACA
GCCACAGACCACAGCCCGGGCGGGGTAAGGGGCTTCGGGCACGAGTGTGGGCTGTGAAAACACGGGCATAAGTCTGGGCC
GAGCACCGACCTGGGCGTCCCGCATTTTCCCTCGCGCAACATCGGTCCCTGGGCAGCGCAACTGTAAGGACAGGAACCGCCGC
GGCGCGCTCCAGTTCCCTTTTTTACCTCTTCCCGCCGATTGCGCGCGCTCGCGCCCTCCTCCAACCCAAAGGACTCC
TTCGGGGCTGAAAAACGCCCTTCCCGCCCTCCCTGTGCGCGTGAACAGGAGTGTAGTATCTCGCGAGAGGTTCGC
CCCCTAGCCGCCCTCCCCCAGCTAGTGAGTGCGCAACGAGAAAGGAGGAGGGCGCTCCAGGCGACAGCACTGCAGACGC
CATTATCC
```

>Promoter2-chr9-85784901-85785200-rev (P2)

```
GGGTAAGGGTTGGGCTCCCTGAAAGGCTGCGTTACTTTTCCCAAGCCCGGGTTTTCTCGAGCCCTTAGTGGCCTCCCAGC
CCGAAGGGAGGCCTGCGGGAGCGGGGTTGTGCGCTCCTCCGTGCGCTTGATTGACGTGGCCTCGGGCCAATCGCTTCGC
CCTCGACCATCGTGAAGCCCTGGCAGCCAATAGGGCGCGACGCGGGGAGGACGCGAGAAGCGGGGGAGGGGAGCCTGC
GCTCGTTTTCTGTCTAGCTCCGACCGCTGAGCGGCGCGCAGCGGAGGGACG
```

>Promoter3-chr9-85784451-85784950-rev (P3)

```
GTTTTCTGTCTAGCTCCGACCGCTGAGCGGCGCGCAGCGGAGGGACGGCAGTCTCGCGGGTGGAGAGCCGGTTGGGG
GAGCGGCTCGTGAGGTTGAGGGTCGGAGCCAGTTTTTCCGCTTGAGGGAGGCGTCTGGGAGCCGCTTTGGTGTGGCCG
CTTCTCCGAGTGGAAACGTTGCCGGTGTCCCTCCCCCTCCGCCATTTCCCTGAGCGTGTATCCGCAGTCCGCGTTGTG
GTCCTAGAGACTTGGGATTCGTGAGGCATGTGCTCTAGGATGAGCTGGAGCTATGTGGCACTGGGAACAGGGACCTCGT
GGAGGAAAGGAGCCGGTGCGGGGAGAAGGTGCGCCCGCGCTCTCTTTGTGTGAGCCCCGCTCACCTTGGGTCTCCCGC
CCGGGGTCCGAGCTGGAGCGCGGGGATGGAACGGTCAGGGCTGCCTCGATGGCTTTGTCTCGGGCAGTGGGGGGAGGATGC
GGGGAT
```

>Promoter4-chr9-85780201-85780900-rev (P4)

```
TACAAACTTGCCGTGTAGGATCTAGGAATGCATTTCAAACCTCCAGAAAACCAAACCAGTCTTATTAGTTAGGGTTTTGGT
GGTGTGGGAATTTTGTGTTTTGTTTTATAAACCTCTCTCCTTAATCCAGATGTTCTGTATAATTATCTGGGTATTAAAT
TCCCCATTTCTCAAGAATTTAGTAAACTTTGAGTCAGGTTTTGTGTCTACCCCTCATGAGCCAGCCTGCTACTGAAACATCG
TTTGTTTTTCTTAAAAATAAAAAAGGCTAGAACCATCATTTGAGGTCCTTAATGTTAAGCCACAGTCAGATTTAGAGAAGTC
CATTATTGTGTAGTCTTCAGAACAACTTAAGCTTGTTTCATTGAGAGTATGAGTATAGTTTGTATTAATTAATTTATATG
CTTTCCCCCTTTCCCTCTCCTGTGTTTTTTGGCCATATACTCCGTTGCCATGTACTGGATCGACTTACCCCTGCGTTGC
CCACCATGACGTTGGCCCATCCGCCCTGAACGCCCATGTGAAAACCTGGTTGGCTATGCCCAAAATGTGCTCGTTGCCAA
ACGGGTACCATACTTGACAACCTCTGATTGAATGCCCATGCCCAATGCCAACATCCACGAACGCCAATGACCAATGCAGTACA
ATGCCAGTGTTCAGTCCCAGACAGCAGTGGCCCCG
```

Supplementary Table S2 . A subset of 132 proteins, out of 297, identified by at least 3 peptides and annotated to the GO term *nucleus* (GO: 0005634) after exclusion of ribosomal proteins and histones.

|    | Accession | Entry name  | Protein names                                                                                                                                                                                                                                                                                                                | Gene names                       | Length |
|----|-----------|-------------|------------------------------------------------------------------------------------------------------------------------------------------------------------------------------------------------------------------------------------------------------------------------------------------------------------------------------|----------------------------------|--------|
| 1  | Q15029    | U5S1_HUMAN  | 116 kDa U5 small nuclear ribonucleoprotein component (U5 snRNP-specific protein, 116 kDa) (U5-116 kDa) (Elongation factor Tu GTP-binding domain-containing protein 2) (hSNU114)                                                                                                                                              | EFTUD2 (KIAA0031) (SNRP116)      | 972    |
| 2  | P60709    | ACTB_HUMAN  | Actin, cytoplasmic 1 (Beta-actin) [Cleaved into: Actin, cytoplasmic 1, N-terminally processed]                                                                                                                                                                                                                               | ACTB                             | 375    |
| 3  | P53999    | TCP4_HUMAN  | Activated RNA polymerase II transcriptional coactivator p15 (SUB1 homolog) (Positive cofactor 4) (PC4) (p14)                                                                                                                                                                                                                 | SUB1 (PC4) (RPO2TC1)             | 127    |
| 4  | P46013    | KI67_HUMAN  | Antigen KI-67                                                                                                                                                                                                                                                                                                                | MKI67                            | 3256   |
| 5  | Q9UKV3    | ACINU_HUMAN | Apoptotic chromatin condensation inducer in the nucleus (Acinus)                                                                                                                                                                                                                                                             | ACIN1 (ACINUS) (KIAA0670)        | 1341   |
| 6  | Q7Z2E3    | APTX_HUMAN  | Aprataxin (EC 3.-.-.-) (Forkhead-associated domain histidine triad-like protein) (FHA-HIT)                                                                                                                                                                                                                                   | APTX (AXA1)                      | 356    |
| 7  | P12956    | KU70_HUMAN  | ATP-dependent DNA helicase 2 subunit 1 (EC 3.6.1.-) (ATP-dependent DNA helicase II 70 kDa subunit) (Lupus Ku autoantigen protein p70) (Ku70) (70 kDa subunit of Ku antigen) (Thyroid-lupus autoantigen) (TLAA) (CTC box-binding factor 75 kDa subunit) (CTCBF) (CTC75) (DNA repair protein XRCC6)                            | XRCC6 (G22P1)                    | 609    |
| 8  | P13010    | KU86_HUMAN  | ATP-dependent DNA helicase 2 subunit 2 (EC 3.6.1.-) (ATP-dependent DNA helicase II 80 kDa subunit) (Lupus Ku autoantigen protein p86) (86 kDa subunit of Ku antigen) (Ku86) (Ku80) (Thyroid-lupus autoantigen) (TLAA) (CTC box-binding factor 85 kDa subunit) (CTCBF) (CTC85) (Nuclear factor IV) (DNA repair protein XRCC5) | XRCC5 (G22P2)                    | 732    |
| 9  | P46063    | RECQ1_HUMAN | ATP-dependent DNA helicase Q1 (EC 3.6.1.-) (DNA-dependent ATPase Q1)                                                                                                                                                                                                                                                         | RECQL (RECQL1)                   | 649    |
| 10 | Q08211    | DHX9_HUMAN  | ATP-dependent RNA helicase A (EC 3.6.1.-) (Nuclear DNA helicase II) (NDH II) (DEAH box protein 9)                                                                                                                                                                                                                            | DHX9 (DDX9) (LKP) (NDH2)         | 1270   |
| 11 | O00571    | DDX3X_HUMAN | ATP-dependent RNA helicase DDX3X (EC 3.6.1.-) (DEAD box protein 3, X-chromosomal) (Helicase-like protein 2) (HLP2) (DEAD box, X isoform)                                                                                                                                                                                     | DDX3X (DBX) (DDX3)               | 662    |
| 12 | O75531    | BAF_HUMAN   | Barrier-to-autointegration factor (Breakpoint cluster region protein 1)                                                                                                                                                                                                                                                      | BANF1 (BAF) (BCRG1)              | 89     |
| 13 | Q9NYF8    | BCLF1_HUMAN | Bcl-2-associated transcription factor 1 (Btf)                                                                                                                                                                                                                                                                                | BCLAF1 (BTF) (KIAA0164)          | 920    |
| 14 | Q96T60    | PNKP_HUMAN  | Bifunctional polynucleotide phosphatase/kinase (Polynucleotide kinase-3'-phosphatase) (DNA 5'-kinase/3'-phosphatase) [Includes: Polynucleotide 3'-phosphatase (EC 3.1.3.32) (2'(3')-polynucleotidase); Polynucleotide 5'-hydroxyl-kinase (EC 2.7.1.78)]                                                                      | PNKP                             | 521    |
| 15 | Q10570    | CPSF1_HUMAN | Cleavage and polyadenylation specificity factor subunit 1 (Cleavage and polyadenylation specificity factor 160 kDa subunit) (CPSF 160 kDa subunit)                                                                                                                                                                           | CPSF1 (CPSF160)                  | 1443   |
| 16 | O43809    | CPSF5_HUMAN | Cleavage and polyadenylation specificity factor subunit 5 (Cleavage and polyadenylation specificity factor 25 kDa subunit) (CPSF 25 kDa subunit) (Pre-mRNA cleavage factor Im 25 kDa subunit) (Nucleoside diphosphate-linked moiety X motif 21) (Nudix motif 21)                                                             | NUDT21 (CFIM25) (CPSF25) (CPSF5) | 227    |
| 17 | Q16630    | CPSF6_HUMAN | Cleavage and polyadenylation specificity factor subunit 6 (Cleavage and polyadenylation specificity factor 68 kDa subunit) (CPSF 68 kDa subunit) (Pre-mRNA cleavage factor Im 68 kDa subunit) (Protein HPBR11-4/7)                                                                                                           | CPSF6 (CFIM68)                   | 551    |
| 18 | Q8N684    | CPSF7_HUMAN | Cleavage and polyadenylation specificity factor subunit 7 (Cleavage and polyadenylation specificity factor 59 kDa subunit) (CPSF 59 kDa subunit) (Pre-mRNA cleavage factor Im 59 kDa subunit)                                                                                                                                | CPSF7                            | 471    |
| 19 | Q12996    | CSTF3_HUMAN | Cleavage stimulation factor 77 kDa subunit (CSTF 77 kDa subunit) (CstF-77) (CF-1 77 kDa subunit)                                                                                                                                                                                                                             | CSTF3                            | 717    |
| 20 | Q14011    | CIRBP_HUMAN | Cold-inducible RNA-binding protein (Glycine-rich RNA-binding protein CIRP) (A18 hnRNP)                                                                                                                                                                                                                                       | CIRBP (A18HNRNP) (CIRP)          | 172    |
| 21 | O75367    | H2AY_HUMAN  | Core histone macro-H2A.1 (Histone macroH2A1) (mH2A1) (H2A.y) (H2A/y) (Medulloblastoma antigen MU-MB-50.205)                                                                                                                                                                                                                  | H2AFY (MACROH2A1)                | 372    |
| 22 | Q96EP5    | DAZP1_HUMAN | DAZ-associated protein 1 (Deleted in azoospermia-associated protein 1)                                                                                                                                                                                                                                                       | DAZAP1                           | 407    |
| 23 | Q9Y295    | DRG1_HUMAN  | Developmentally-regulated GTP-binding protein 1 (DRG-1) (Neural precursor cell expressed developmentally down-regulated protein 3) (NEDD-3)                                                                                                                                                                                  | DRG1 (NEDD3)                     | 367    |

|    |        |             |                                                                                                                                                                                                                                                                                                                                                           |                                        |      |
|----|--------|-------------|-----------------------------------------------------------------------------------------------------------------------------------------------------------------------------------------------------------------------------------------------------------------------------------------------------------------------------------------------------------|----------------------------------------|------|
| 24 | P26358 | DNMT1_HUMAN | DNA (cytosine-5)-methyltransferase 1 (Dnmt1) (EC 2.1.1.37) (MCMT) (DNA methyltransferase HsaI) (DNA MTase HsaI) (M.HsaI) (CXXC-type zinc finger protein 9)                                                                                                                                                                                                | DNMT1 (AIM) (CXXC9) (DNMT)             | 1616 |
| 25 | P49916 | DNL3_HUMAN  | DNA ligase 3 (EC 6.5.1.1) (DNA ligase III) (Polydeoxyribonucleotide synthase [ATP] 3)                                                                                                                                                                                                                                                                     | LIG3                                   | 1009 |
| 26 | P18887 | XRCC1_HUMAN | DNA repair protein XRCC1 (X-ray repair cross-complementing protein 1)                                                                                                                                                                                                                                                                                     | XRCC1                                  | 633  |
| 27 | P11387 | TOP1_HUMAN  | DNA topoisomerase 1 (EC 5.99.1.2) (DNA topoisomerase I)                                                                                                                                                                                                                                                                                                   | TOP1                                   | 765  |
| 28 | P11388 | TOP2A_HUMAN | DNA topoisomerase 2-alpha (EC 5.99.1.3) (DNA topoisomerase II, alpha isozyme)                                                                                                                                                                                                                                                                             | TOP2A (TOP2)                           | 1531 |
| 29 | Q02880 | TOP2B_HUMAN | DNA topoisomerase 2-beta (EC 5.99.1.3) (DNA topoisomerase II, beta isozyme)                                                                                                                                                                                                                                                                               | TOP2B                                  | 1626 |
| 30 | P27695 | APEX1_HUMAN | DNA-(apurinic or apyrimidinic site) lyase (EC 4.2.99.18) (Apurinic-apyrimidinic endonuclease 1) (AP endonuclease 1) (APEX nuclease) (APEN) (Protein REF-1)                                                                                                                                                                                                | APEX1 (APE) (APEX) (APX) (HAP1) (REF1) | 318  |
| 31 | P29372 | 3MG_HUMAN   | DNA-3-methyladenine glycosylase (EC 3.2.2.21) (3-methyladenine DNA glycosidase) (ADPG) (3-alkyladenine DNA glycosylase) (N-methylpurine-DNA glycosylase)                                                                                                                                                                                                  | MPG (AAG) (ANPG) (MID1)                | 298  |
| 32 | P78527 | PRKDC_HUMAN | DNA-dependent protein kinase catalytic subunit (DNA-PK catalytic subunit) (DNA-PKcs) (EC 2.7.11.1) (DNPk1) (p460)                                                                                                                                                                                                                                         | PRKDC (HYRC) (HYRC1)                   | 4128 |
| 33 | P49792 | RBP2_HUMAN  | E3 SUMO-protein ligase RanBP2 (Ran-binding protein 2) (Nuclear pore complex protein Nup358) (Nucleoporin Nup358) (358 kDa nucleoporin) (p270)                                                                                                                                                                                                             | RANBP2 (NUP358)                        | 3224 |
| 34 | Q96T88 | UHRF1_HUMAN | E3 ubiquitin-protein ligase UHRF1 (EC 6.3.2.-) (Ubiquitin-like PHD and RING finger domain-containing protein 1) (Ubiquitin-like-containing PHD and RING finger domains protein 1) (Inverted CCAAT box-binding protein of 90 kDa) (Transcription factor ICBP90) (Nuclear zinc finger protein Np95) (Nuclear protein 95) (HuNp95) (RING finger protein 106) | UHRF1 (ICBP90) (NP95) (RNF106)         | 793  |
| 35 | P78549 | NTHL1_HUMAN | Endonuclease III-like protein 1 (EC 4.2.99.18)                                                                                                                                                                                                                                                                                                            | NTHL1 (NTH1) (OCTS3)                   | 312  |
| 36 | Q9NQ4  | EXOS5_HUMAN | Exosome complex exonuclease RRP46 (EC 3.1.13.-) (Ribosomal RNA-processing protein 46) (Exosome component 5) (p12B) (Chronic myelogenous leukemia tumor antigen 28)                                                                                                                                                                                        | EXOSC5 (CML28) (RRP46)                 | 235  |
| 37 | Q9Y5B9 | SP16H_HUMAN | FACT complex subunit SPT16 (Facilitates chromatin transcription complex subunit SPT16) (hSPT16) (FACT 140 kDa subunit) (FACTp140) (Chromatin-specific transcription elongation factor 140 kDa subunit)                                                                                                                                                    | SUPT16H (FACT140) (FACTP140)           | 1047 |
| 38 | Q96I24 | FUBP3_HUMAN | Far upstream element-binding protein 3 (FUSE-binding protein 3)                                                                                                                                                                                                                                                                                           | FUBP3 (FBP3)                           | 572  |
| 39 | P21333 | FLNA_HUMAN  | Filamin-A (Alpha-filamin) (Filamin-1) (Endothelial actin-binding protein) (Actin-binding protein 280) (ABP-280) (Non-muscle filamin)                                                                                                                                                                                                                      | FLNA (FLN) (FLN1)                      | 2647 |
| 40 | P39748 | FEN1_HUMAN  | Flap endonuclease 1 (FEN-1) (EC 3.1.-.-) (Flap structure-specific endonuclease 1) (Maturation factor 1) (MF1) (hFEN-1) (DNase IV)                                                                                                                                                                                                                         | FEN1 (RAD2)                            | 380  |
| 41 | P78347 | GTF2I_HUMAN | General transcription factor II-I (GTFII-I) (TFII-I) (Bruton tyrosine kinase-associated protein 135) (BTK-associated protein 135) (BAP-135) (SRF-Phox1-interacting protein) (SPIN) (Williams-Beuren syndrome chromosomal region 6 protein)                                                                                                                | GTF2I (BAP135) (WBSCR6)                | 998  |
| 42 | Q9BQ67 | GRWD1_HUMAN | Glutamate-rich WD repeat-containing protein 1                                                                                                                                                                                                                                                                                                             | GRWD1 (GRWD) (KIAA1942) (WDR28)        | 446  |
| 43 | P62826 | RAN_HUMAN   | GTP-binding nuclear protein Ran (GTPase Ran) (Ras-related nuclear protein) (Ras-like protein TC4) (Androgen receptor-associated protein 24)                                                                                                                                                                                                               | RAN (ARA24) (OK/SW-cl.81)              | 216  |
| 44 | O60832 | DKC1_HUMAN  | H/ACA ribonucleoprotein complex subunit 4 (EC 5.4.99.-) (Dyskerin) (Nucleolar protein family A member 4) (snRNP protein DKC1) (Nopp140-associated protein of 57 kDa) (Nucleolar protein NAP57) (CBF5 homolog)                                                                                                                                             | DKC1 (NOLA4)                           | 514  |
| 45 | Q5SSJ5 | HP1B3_HUMAN | Heterochromatin protein 1-binding protein 3 (Protein HP1-BP74)                                                                                                                                                                                                                                                                                            | HP1BP3                                 | 553  |
| 46 | Q99729 | ROAA_HUMAN  | Heterogeneous nuclear ribonucleoprotein A/B (hnRNP A/B) (APOBEC1-binding protein 1) (ABBP-1)                                                                                                                                                                                                                                                              | HNRNPAB (ABBP1) (HNRPAB)               | 332  |
| 47 | Q13151 | ROA0_HUMAN  | Heterogeneous nuclear ribonucleoprotein A0 (hnRNP A0)                                                                                                                                                                                                                                                                                                     | HNRNPA0 (HNRPA0)                       | 305  |
| 48 | P09651 | ROA1_HUMAN  | Heterogeneous nuclear ribonucleoprotein A1 (hnRNP core protein A1) (Helix-destabilizing protein) (Single-strand RNA-binding protein)                                                                                                                                                                                                                      | HNRNPA1 (HNRPA1)                       | 372  |

|    |        |             |                                                                                                                                                                                                                                                                            |                                          |      |
|----|--------|-------------|----------------------------------------------------------------------------------------------------------------------------------------------------------------------------------------------------------------------------------------------------------------------------|------------------------------------------|------|
| 49 | P51991 | ROA3_HUMAN  | Heterogeneous nuclear ribonucleoprotein A3 (hnRNP A3)                                                                                                                                                                                                                      | HNRNPA3<br>(HNRPA3)                      | 378  |
| 50 | Q14103 | HNRPD_HUMAN | Heterogeneous nuclear ribonucleoprotein D0 (hnRNP D0) (AU-rich element RNA-binding protein 1)                                                                                                                                                                              | HNRNPD<br>(AUF1)<br>(HNRPD)              | 355  |
| 51 | O14979 | HNRDL_HUMAN | Heterogeneous nuclear ribonucleoprotein D-like (hnRNP D-like protein) (hnHNRP-DL) (JKT41-binding protein) (AU-rich element RNA-binding factor) (Protein laAUF1)                                                                                                            | HNRPDL<br>(JKTBP)                        | 420  |
| 52 | P38159 | HNRPG_HUMAN | Heterogeneous nuclear ribonucleoprotein G (hnRNP G) (RNA-binding motif protein, X chromosome) (Glycoprotein p43) [Cleaved into: Heterogeneous nuclear ribonucleoprotein G, N-terminally processed]                                                                         | RBMX<br>(HNRPG)<br>(RBMXP1)              | 391  |
| 53 | P31943 | HNRH1_HUMAN | Heterogeneous nuclear ribonucleoprotein H (hnRNP H) [Cleaved into: Heterogeneous nuclear ribonucleoprotein H, N-terminally processed]                                                                                                                                      | HNRNPH1<br>(HNRPH)<br>(HNRPH1)           | 449  |
| 54 | P61978 | HNRPK_HUMAN | Heterogeneous nuclear ribonucleoprotein K (hnRNP K) (Transformation up-regulated nuclear protein) (TUNP)                                                                                                                                                                   | HNRNPK<br>(HNRPK)                        | 463  |
| 55 | P14866 | HNRPL_HUMAN | Heterogeneous nuclear ribonucleoprotein L (hnRNP L)                                                                                                                                                                                                                        | HNRNPL<br>(HNRPL)<br>(P/OKcl.14)         | 589  |
| 56 | P52272 | HNRPM_HUMAN | Heterogeneous nuclear ribonucleoprotein M (hnRNP M)                                                                                                                                                                                                                        | HNRNPM<br>(HNRPM)<br>(NAGR1)             | 730  |
| 57 | O60506 | HNRPQ_HUMAN | Heterogeneous nuclear ribonucleoprotein Q (hnRNP Q) (hnRNP-Q) (Synaptotagmin-binding, cytoplasmic RNA-interacting protein) (Glycine- and tyrosine-rich RNA-binding protein) (GRY-RBP) (NS1-associated protein 1)                                                           | SYNCRIP<br>(HNRPQ)<br>(NSAP1)            | 623  |
| 58 | O43390 | HNRPR_HUMAN | Heterogeneous nuclear ribonucleoprotein R (hnRNP R)                                                                                                                                                                                                                        | HNRNPR<br>(HNRPR)                        | 633  |
| 59 | Q00839 | HNRPU_HUMAN | Heterogeneous nuclear ribonucleoprotein U (hnRNP U) (Scaffold attachment factor A) (SAF-A) (p120) (pp120)                                                                                                                                                                  | HNRNPU<br>(HNRPU)<br>(SAFA) (U21.1)      | 825  |
| 60 | Q9BUJ2 | HNRL1_HUMAN | Heterogeneous nuclear ribonucleoprotein U-like protein 1 (Adenovirus early region 1B-associated protein 5) (E1B-55 kDa-associated protein 5) (E1B-AP5)                                                                                                                     | HNRNPUL1<br>(E1BAP5)<br>(HNRPUL1)        | 856  |
| 61 | P22626 | ROA2_HUMAN  | Heterogeneous nuclear ribonucleoproteins A2/B1 (hnRNP A2 / hnRNP B1)                                                                                                                                                                                                       | HNRNPA2B1<br>(HNRPA2B1)                  | 353  |
| 62 | P07910 | HNRPC_HUMAN | Heterogeneous nuclear ribonucleoproteins C1/C2 (hnRNP C1 / hnRNP C2)                                                                                                                                                                                                       | HNRNPC<br>(HNRPC)                        | 306  |
| 63 | Q9NZI8 | IF2B1_HUMAN | Insulin-like growth factor 2 mRNA-binding protein 1 (IGF2 mRNA-binding protein 1) (IMP-1) (IGF-II mRNA-binding protein 1) (Coding region determinant-binding protein) (CRD-BP) (VICKZ family member 1) (Zip code-binding protein 1) (Zipcode-binding protein 1) (ZBP-1)    | IGF2BP1<br>(CRDBP)<br>(VICKZ1)<br>(ZBP1) | 577  |
| 64 | O00425 | IF2B3_HUMAN | Insulin-like growth factor 2 mRNA-binding protein 3 (IGF2 mRNA-binding protein 3) (IMP-3) (IGF-II mRNA-binding protein 3) (KH domain-containing protein overexpressed in cancer) (hKOC) (VICKZ family member 3)                                                            | IGF2BP3<br>(IMP3) (KOC1)<br>(VICKZ3)     | 579  |
| 65 | Q12905 | ILF2_HUMAN  | Interleukin enhancer-binding factor 2 (Nuclear factor of activated T-cells 45 kDa)                                                                                                                                                                                         | ILF2 (NF45)<br>(PRO3063)                 | 390  |
| 66 | Q12906 | ILF3_HUMAN  | Interleukin enhancer-binding factor 3 (Nuclear factor of activated T-cells 90 kDa) (NF-AT-90) (Double-stranded RNA-binding protein 76) (DRBP76) (Translational control protein 80) (TCP80) (Nuclear factor associated with dsRNA) (NFAR) (M-phase phosphoprotein 4) (MPP4) | ILF3 (DRBF)<br>(MPHOSPH4)<br>(NF90)      | 894  |
| 67 | Q07666 | KHDR1_HUMAN | KH domain-containing, RNA-binding, signal transduction-associated protein 1 (p21 Ras GTPase-activating protein-associated p62) (GAP-associated tyrosine phosphoprotein p62) (Src-associated in mitosis 68 kDa protein) (Sam68) (p68)                                       | KHDRBS1<br>(SAM68)                       | 443  |
| 68 | P42166 | LAP2A_HUMAN | Lamina-associated polypeptide 2, isoform alpha (Thymopoietin isoform alpha) (TP alpha) (Thymopoietin-related peptide isoform alpha) (TPRP isoform alpha) [Cleaved into: Thymopoietin (TP) (Splenin); Thymopentin (TP5)]                                                    | TMPO (LAP2)                              | 694  |
| 69 | P43243 | MATR3_HUMAN | Matrin-3                                                                                                                                                                                                                                                                   | MATR3<br>(KIAA0723)                      | 847  |
| 70 | Q14676 | MDC1_HUMAN  | Mediator of DNA damage checkpoint protein 1 (Nuclear factor with BRCT domains 1)                                                                                                                                                                                           | MDC1<br>(KIAA0170)<br>(NFB1)             | 2089 |
| 71 | Q9BQG0 | MBB1A_HUMAN | Myb-binding protein 1A                                                                                                                                                                                                                                                     | MYBBP1A<br>(P160)                        | 1328 |

|    |        |             |                                                                                                                                                                                                                                          |                                |      |
|----|--------|-------------|------------------------------------------------------------------------------------------------------------------------------------------------------------------------------------------------------------------------------------------|--------------------------------|------|
| 72 | P35579 | MYH9_HUMAN  | Myosin-9 (Myosin heavy chain 9) (Myosin heavy chain, non-muscle IIa) (Non-muscle myosin heavy chain IIa) (NMMHC II-a) (NMMHC-IIA) (Cellular myosin heavy chain, type A) (Non-muscle myosin heavy chain A) (NMMHC-A)                      | MYH9                           | 1960 |
| 73 | Q9H0A0 | NAT10_HUMAN | N-acetyltransferase 10 (EC 2.3.1.-)                                                                                                                                                                                                      | NAT10 (ALP) (KIAA1709)         | 1025 |
| 74 | Q09666 | AHNK_HUMAN  | Neuroblast differentiation-associated protein AHNK (Desmoyokin)                                                                                                                                                                          | AHNAK (PM227)                  | 5890 |
| 75 | P55769 | NH2L1_HUMAN | NHP2-like protein 1 (High mobility group-like nuclear protein 2 homolog 1) (U4/U6.U5 tri-snRNP 15.5 kDa protein) (OTK27) (hSNU13)                                                                                                        | NHP2L1                         | 128  |
| 76 | Q15233 | NONO_HUMAN  | Non-POU domain-containing octamer-binding protein (NonO protein) (54 kDa nuclear RNA- and DNA-binding protein) (p54(nrb)) (p54nrb) (55 kDa nuclear protein) (NMT55) (DNA-binding p52/p100 complex, 52 kDa subunit)                       | NONO (NRB54)                   | 471  |
| 77 | Q14980 | NUMA1_HUMAN | Nuclear mitotic apparatus protein 1 (NuMA protein) (SP-H antigen)                                                                                                                                                                        | NUMA1 (NUMA)                   | 2115 |
| 78 | Q9UBU9 | NXFI_HUMAN  | Nuclear RNA export factor 1 (Tip-associating protein) (Tip-associated protein) (mRNA export factor TAP)                                                                                                                                  | NXFI (TAP)                     | 619  |
| 79 | P67809 | YBOX1_HUMAN | Nuclease-sensitive element-binding protein 1 (Y-box-binding protein 1) (Y-box transcription factor) (YB-1) (CCAAT-binding transcription factor I subunit A) (CBF-A) (Enhancer factor I subunit A) (EFI-A) (DNA-binding protein B) (DBPB) | YBX1 (NSEP1) (YB1)             | 324  |
| 80 | Q14978 | NOLC1_HUMAN | Nucleolar phosphoprotein p130 (Nucleolar 130 kDa protein) (140 kDa nucleolar phosphoprotein) (Nopp140) (Nucleolar and coiled-body phosphoprotein 1) (HCV NS5A trans-regulated protein 13) (NS5ATP13)                                     | NOLC1 (KIAA0035)               | 699  |
| 81 | O00567 | NOP56_HUMAN | Nucleolar protein 56 (Nucleolar protein 5A)                                                                                                                                                                                              | NOP56 (NOL5A)                  | 594  |
| 82 | Q9NR30 | DDX21_HUMAN | Nucleolar RNA helicase 2 (EC 3.6.1.-) (Nucleolar RNA helicase II) (Nucleolar RNA helicase Gu) (RH II/Gu) (Gu-alpha) (DEAD box protein 21)                                                                                                | DDX21                          | 783  |
| 83 | P19338 | NUCL_HUMAN  | Nucleolin (Protein C23)                                                                                                                                                                                                                  | NCL                            | 710  |
| 84 | Q8WXF1 | PSPC1_HUMAN | Paraspeckle component 1 (Paraspeckle protein 1)                                                                                                                                                                                          | PSPC1 (PSP1)                   | 523  |
| 85 | O75475 | PSIP1_HUMAN | PC4 and SFRS1-interacting protein (Lens epithelium-derived growth factor) (Transcriptional coactivator p75/p52) (Dense fine speckles 70 kDa protein) (DFS 70) (CLL-associated antigen KW-7)                                              | PSIP1 (DFS70) (LEDGF) (PSIP2)  | 530  |
| 86 | Q8NC51 | PAIRB_HUMAN | Plasminogen activator inhibitor 1 RNA-binding protein (PAI1 RNA-binding protein 1) (PAI-RBP1) (SERPINE1 mRNA-binding protein 1)                                                                                                          | SERP1 (PAIRBP1) (CGI-55)       | 408  |
| 87 | P09874 | PARP1_HUMAN | Poly [ADP-ribose] polymerase 1 (PARP-1) (EC 2.4.2.30) (ADPRT) (NAD(+) ADP-ribosyltransferase 1) (Poly[ADP-ribose] synthetase 1)                                                                                                          | PARP1 (ADPRT) (PPOL)           | 1014 |
| 88 | Q15365 | PCBP1_HUMAN | Poly(rC)-binding protein 1 (Alpha-CP1) (hnRNP-E1) (Nucleic acid-binding protein SUB2.3)                                                                                                                                                  | PCBP1                          | 356  |
| 89 | P11940 | PABP1_HUMAN | Polyadenylate-binding protein 1 (Poly(A)-binding protein 1) (PABP 1)                                                                                                                                                                     | PABPC1 (PAB1) (PABP1) (PABPC2) | 636  |
| 90 | Q9BY77 | PDIP3_HUMAN | Polymerase delta-interacting protein 3 (46 kDa DNA polymerase delta interaction protein) (p46)                                                                                                                                           | POLDIP3 (KIAA1649) (PDIP46)    | 421  |
| 91 | P26599 | PTBP1_HUMAN | Polypyrimidine tract-binding protein 1 (PTB) (Heterogeneous nuclear ribonucleoprotein I) (hnRNP I) (57 kDa RNA-binding protein PPTB-1)                                                                                                   | PTBP1 (PTB)                    | 531  |
| 92 | Q9UMS4 | PRP19_HUMAN | Pre-mRNA-processing factor 19 (PRP19/PSO4 homolog) (hPso4) (Nuclear matrix protein 200) (Senescence evasion factor)                                                                                                                      | PRPF19 (NMP200) (PRP19) (SNEV) | 504  |
| 93 | Q6P2Q9 | PRP8_HUMAN  | Pre-mRNA-processing-splicing factor 8 (Splicing factor Prp8) (PRP8 homolog) (220 kDa U5 snRNP-specific protein) (p220)                                                                                                                   | PRPF8 (PRPC8)                  | 2335 |
| 94 | Q92841 | DDX17_HUMAN | Probable ATP-dependent RNA helicase DDX17 (EC 3.6.1.-) (DEAD box protein 17) (RNA-dependent helicase p72) (DEAD box protein p72)                                                                                                         | DDX17                          | 650  |
| 95 | Q9H0S4 | DDX47_HUMAN | Probable ATP-dependent RNA helicase DDX47 (EC 3.6.1.-) (DEAD box protein 47)                                                                                                                                                             | DDX47                          | 455  |
| 96 | P17844 | DDX5_HUMAN  | Probable ATP-dependent RNA helicase DDX5 (EC 3.6.1.-) (DEAD box protein 5) (RNA helicase p68)                                                                                                                                            | DDX5 (G17P1) (HELR) (HLR1)     | 614  |
| 97 | Q9UQ80 | PA2G4_HUMAN | Proliferation-associated protein 2G4 (Cell cycle protein p38-2G4 homolog) (hG4-1) (ErbB3-binding protein 1)                                                                                                                              | PA2G4 (EBP1)                   | 394  |

|     |        |             |                                                                                                                                                                                                                               |                                         |      |
|-----|--------|-------------|-------------------------------------------------------------------------------------------------------------------------------------------------------------------------------------------------------------------------------|-----------------------------------------|------|
| 98  | Q9P258 | RCC2_HUMAN  | Protein RCC2 (Telophase disk protein of 60 kDa) (RCC1-like protein TD-60)                                                                                                                                                     | RCC2 (KIAA1470) (TD60)                  | 522  |
| 99  | Q14690 | RRP5_HUMAN  | Protein RRP5 homolog (Programmed cell death protein 11) (NF-kappa-B-binding protein) (NFBP)                                                                                                                                   | PDCD11 (KIAA0185)                       | 1871 |
| 100 | O43143 | DHX15_HUMAN | Putative pre-mRNA-splicing factor ATP-dependent RNA helicase DHX15 (EC 3.6.1.-) (DEAH box protein 15) (ATP-dependent RNA helicase #46)                                                                                        | DHX15 (DBP1) (DDX15)                    | 795  |
| 101 | P46087 | NOP2_HUMAN  | Putative ribosomal RNA methyltransferase NOP2 (EC 2.1.1.-) (Nucleolar protein 2 homolog) (Nucleolar protein 1) (Proliferating-cell nucleolar antigen p120) (Proliferation-associated nucleolar protein p120)                  | NOP2 (NOL1)                             | 812  |
| 102 | P46060 | RAGP1_HUMAN | Ran GTPase-activating protein 1 (RanGAP1)                                                                                                                                                                                     | RANGAP1 (KIAA1835) (SD)                 | 587  |
| 103 | Q13283 | G3BP1_HUMAN | Ras GTPase-activating protein-binding protein 1 (EC 3.6.1.-) (G3BP-1) (ATP-dependent DNA helicase VIII) (HDH-VIII) (GAP SH3 domain-binding protein 1)                                                                         | G3BP1 (G3BP)                            | 466  |
| 104 | P46940 | IQGA1_HUMAN | Ras GTPase-activating-like protein IQGAP1 (p195)                                                                                                                                                                              | IQGAP1 (KIAA0051)                       | 1657 |
| 105 | P18754 | RCC1_HUMAN  | Regulator of chromosome condensation (Chromosome condensation protein 1) (Cell cycle regulatory protein)                                                                                                                      | RCC1 (CHC1)                             | 421  |
| 106 | P35251 | RFC1_HUMAN  | Replication factor C subunit 1 (Activator 1 subunit 1) (Replication factor C large subunit) (RF-C 140 kDa subunit) (Activator 1 140 kDa subunit) (A1 140 kDa subunit) (Activator 1 large subunit) (DNA-binding protein PO-GA) | RFC1 (RFC140)                           | 1148 |
| 107 | P35250 | RFC2_HUMAN  | Replication factor C subunit 2 (Activator 1 subunit 2) (Replication factor C 40 kDa subunit) (RF-C 40 kDa subunit) (RFC40) (Activator 1 40 kDa subunit) (A1 40 kDa subunit)                                                   | RFC2                                    | 354  |
| 108 | P40938 | RFC3_HUMAN  | Replication factor C subunit 3 (Activator 1 subunit 3) (Replication factor C 38 kDa subunit) (RF-C 38 kDa subunit) (RFC38) (Activator 1 38 kDa subunit) (A1 38 kDa subunit)                                                   | RFC3                                    | 356  |
| 109 | P35249 | RFC4_HUMAN  | Replication factor C subunit 4 (Activator 1 subunit 4) (Replication factor C 37 kDa subunit) (RF-C 37 kDa subunit) (RFC37) (Activator 1 37 kDa subunit) (A1 37 kDa subunit)                                                   | RFC4                                    | 363  |
| 110 | P40937 | RFC5_HUMAN  | Replication factor C subunit 5 (Activator 1 subunit 5) (Replication factor C 36 kDa subunit) (RF-C 36 kDa subunit) (RFC36) (Activator 1 36 kDa subunit) (A1 36 kDa subunit)                                                   | RFC5                                    | 340  |
| 111 | O76021 | RL1D1_HUMAN | Ribosomal L1 domain-containing protein 1 (Cellular senescence-inhibited gene protein) (Protein PBK1) (CATX-11)                                                                                                                | RSL1D1 (CATX11) (CSIG) (PBK1) (L12)     | 490  |
| 112 | Q96PK6 | RBM14_HUMAN | RNA-binding protein 14 (RNA-binding motif protein 14) (RRM-containing coactivator activator/modulator) (Synaptotagmin-interacting protein) (SYT-interacting protein) (Paraspeckle protein 2) (PSP2)                           | RBM14 (SIP)                             | 669  |
| 113 | Q9NW13 | RBM28_HUMAN | RNA-binding protein 28 (RNA-binding motif protein 28)                                                                                                                                                                         | RBM28                                   | 759  |
| 114 | Q14498 | RBM39_HUMAN | RNA-binding protein 39 (RNA-binding motif protein 39) (RNA-binding region-containing protein 2) (Hepatocellular carcinoma protein 1) (Splicing factor HCC1)                                                                   | RBM39 (HCC1) (RNPC2)                    | 530  |
| 115 | Q01844 | EWS_HUMAN   | RNA-binding protein EWS (EWS oncogene) (Ewing sarcoma breakpoint region 1 protein)                                                                                                                                            | EWSR1 (EWS)                             | 656  |
| 116 | P35637 | FUS_HUMAN   | RNA-binding protein FUS (Oncogene FUS) (Oncogene TLS) (Translocated in liposarcoma protein) (POMP75) (75 kDa DNA-pairing protein)                                                                                             | FUS (TLS)                               | 526  |
| 117 | P22087 | FBRL_HUMAN  | rRNA 2'-O-methyltransferase fibrillarlin (EC 2.1.1.-) (34 kDa nucleolar scleroderma antigen)                                                                                                                                  | FBL (FIB1) (FLRN)                       | 321  |
| 118 | Q15424 | SAFB1_HUMAN | Scaffold attachment factor B1 (SAB-B1) (SAF-B) (HSP27 estrogen response element-TATA box-binding protein) (HSP27 ERE-TATA-binding protein)                                                                                    | SAFB (HAP) (HET) (SAFB1)                | 915  |
| 119 | P62136 | PP1A_HUMAN  | Serine/threonine-protein phosphatase PP1-alpha catalytic subunit (PP-1A) (EC 3.1.3.16)                                                                                                                                        | PPP1CA (PPP1A)                          | 330  |
| 120 | Q15393 | SF3B3_HUMAN | Splicing factor 3B subunit 3 (Spliceosome-associated protein 130) (SAP 130) (Pre-mRNA-splicing factor SF3b 130 kDa subunit) (SF3b130) (STAF130)                                                                               | SF3B3 (KIAA0017) (SAP130)               | 1217 |
| 121 | P26368 | U2AF2_HUMAN | Splicing factor U2AF 65 kDa subunit (U2 auxiliary factor 65 kDa subunit) (hU2AF65) (hU2AF(65)) (U2 snRNP auxiliary factor large subunit)                                                                                      | U2AF2 (U2AF65)                          | 475  |
| 122 | Q07955 | SFRS1_HUMAN | Splicing factor, arginine/serine-rich 1 (pre-mRNA-splicing factor SF2, P33 subunit) (Alternative-splicing factor 1) (ASF-1)                                                                                                   | SFRS1 (ASF) (SF2) (SF2P33) (OK/SW-cl.3) | 248  |
| 123 | P84103 | SFRS3_HUMAN | Splicing factor, arginine/serine-rich 3 (Pre-mRNA-splicing factor SRP20)                                                                                                                                                      | SFRS3 (SRP20)                           | 164  |
| 124 | Q13243 | SFRS5_HUMAN | Splicing factor, arginine/serine-rich 5 (Pre-mRNA-splicing factor SRP40) (Delayed-early protein HRS)                                                                                                                          | SFRS5 (HRS) (SRP40)                     | 272  |



|     |        |             |                                                                                                                                                                                                                                                |                                        |      |
|-----|--------|-------------|------------------------------------------------------------------------------------------------------------------------------------------------------------------------------------------------------------------------------------------------|----------------------------------------|------|
| 125 | Q16629 | SFRS7_HUMAN | Splicing factor, arginine/serine-rich 7 (Splicing factor 9G8)                                                                                                                                                                                  | SFRS7                                  | 238  |
| 126 | P23246 | SFPQ_HUMAN  | Splicing factor, proline- and glutamine-rich (Polypyrimidine tract-binding protein-associated-splicing factor) (PTB-associated-splicing factor) (PSF) (DNA-binding p52/p100 complex, 100 kDa subunit) (100 kDa DNA-pairing protein) (hPOMp100) | SFPQ (PSF)                             | 707  |
| 127 | Q9NZC9 | SMAL1_HUMAN | SWI/SNF-related matrix-associated actin-dependent regulator of chromatin subfamily A-like protein 1 (EC 3.6.1.-) (Sucrose nonfermenting protein 2-like 1) (HepA-related protein) (hHARP)                                                       | SMARCAL1 (HARP)                        | 954  |
| 128 | Q13148 | TADBP_HUMAN | TAR DNA-binding protein 43 (TDP-43)                                                                                                                                                                                                            | TARDBP (TDP43)                         | 414  |
| 129 | Q86V81 | THOC4_HUMAN | THO complex subunit 4 (Tho4) (Ally of AML-1 and LEF-1) (Transcriptional coactivator Aly/REF) (bZIP-enhancing factor BEF)                                                                                                                       | THOC4 (ALY) (BEF)                      | 257  |
| 130 | Q9Y2W1 | TR150_HUMAN | Thyroid hormone receptor-associated protein 3 (Thyroid hormone receptor-associated protein complex 150 kDa component) (Trap150)                                                                                                                | THRAP3 (TRAP150)                       | 955  |
| 131 | O75643 | U520_HUMAN  | U5 small nuclear ribonucleoprotein 200 kDa helicase (EC 3.6.1.-) (U5 snRNP-specific 200 kDa protein) (U5-200KD) (Activating signal cointegrator 1 complex subunit 3-like 1) (BRR2 homolog)                                                     | SNRNP200 (ASCC3L1) (HELIC2) (KIAA0788) | 2136 |
| 132 | Q9Y224 | CN166_HUMAN | UPF0568 protein C14orf166                                                                                                                                                                                                                      | C14orf166 (CGI-99)                     | 244  |

Supplementary Table S3. Lists of proteins extracted from the nuclei of both resting and proliferating cells that relative levels didn't change or were enriched in the binding reactions conducted with a competitor.

| single stranded DNA probes                                                | double stranded DNA probes                                                         |
|---------------------------------------------------------------------------|------------------------------------------------------------------------------------|
| O00425 Insulin-like growth factor 2 mRNA-binding protein 3                | O43809 Cleavage and polyadenylation specificity factor subunit 5                   |
| O00567 Nucleolar protein 5A                                               | P11388 DNA topoisomerase 2-alpha                                                   |
| O43143 Putative pre-mRNA-splicing factor ATP-dependent RNA helicase DHX15 | P14866 Heterogeneous nuclear ribonucleoprotein L                                   |
| O43390 Heterogeneous nuclear ribonucleoprotein R                          | P17844 Probable ATP-dependent RNA helicase DDX5                                    |
| O43809 Cleavage and polyadenylation specificity factor subunit 5          | P22626 Heterogeneous nuclear ribonucleoproteins A2/B1                              |
| O60832 H/ACA ribonucleoprotein complex subunit 4                          | P26599 Polypyrimidine tract-binding protein 1                                      |
| O75367 Core histone macro-H2A.1                                           | P31943 Heterogeneous nuclear ribonucleoprotein H                                   |
| O75475 PC4 and SFRS1-interacting protein                                  | P38159 Heterogeneous nuclear ribonucleoprotein G                                   |
| O75643 U5 small nuclear ribonucleoprotein 200 kDa helicase                | P42166 Lamina-associated polypeptide 2, isoform alpha                              |
| O76021 Ribosomal L1 domain-containing protein 1                           | P46013 Antigen KI-67                                                               |
| P06748 Nucleophosmin                                                      | P60709 Actin, cytoplasmic 1                                                        |
| P07910 Heterogeneous nuclear ribonucleoproteins C1/C2                     | P84103 Splicing factor, arginine/serine-rich 3                                     |
| P11387 DNA topoisomerase 1                                                | Q09666 Neuroblast differentiation-associated protein AHNAK                         |
| P11388 DNA topoisomerase 2-alpha                                          | Q07666 KH domain-containing, RNA-binding, signal transduction-associated protein 1 |
| P11940 Polyadenylate-binding protein 1                                    | Q08211 ATP-dependent RNA helicase A                                                |
| P14866 Heterogeneous nuclear ribonucleoprotein L                          | Q5SSJ5 Heterochromatin protein 1-binding protein 3                                 |
| P17844 Probable ATP-dependent RNA helicase DDX5                           | Q86V81 THO complex subunit 4                                                       |
| P18754 Regulator of chromosome condensation                               | Q92841 Probable ATP-dependent RNA helicase DDX17                                   |
| P23246 Splicing factor, proline- and glutamine-rich                       | Q9NR30 Nucleolar RNA helicase 2                                                    |
| P26368 Splicing factor U2AF 65 kDa subunit                                | Q8NC51 Plasminogen activator inhibitor 1 RNA-binding protein                       |
| P35250 Replication factor C subunit 2                                     | Q9P258 Protein RCC2                                                                |
| P35251 Replication factor C subunit 1                                     |                                                                                    |
| P35579 Myosin-9                                                           |                                                                                    |
| P38159 Heterogeneous nuclear ribonucleoprotein G                          |                                                                                    |
| P40938 Replication factor C subunit 3                                     |                                                                                    |
| P43243 Matrin-3                                                           |                                                                                    |
| P46013 Antigen KI-67                                                      |                                                                                    |
| P46060 Ran GTPase-activating protein 1                                    |                                                                                    |
| P46087 Putative ribosomal RNA methyltransferase NOP2                      |                                                                                    |
| P49792 E3 SUMO-protein ligase RanBP2                                      |                                                                                    |
| P55769 NHP2-like protein 1                                                |                                                                                    |
| P60709 Actin, cytoplasmic 1                                               |                                                                                    |
| P61978 Heterogeneous nuclear ribonucleoprotein K                          |                                                                                    |
| P62136 Serine/threonine-protein phosphatase PP1-alpha catalytic subunit   |                                                                                    |
| P62826 GTP-binding nuclear protein Ran                                    |                                                                                    |
| P78347 General transcription factor II-I                                  |                                                                                    |
| P78549 Endonuclease III-like protein 1                                    |                                                                                    |

|                                                                  |  |
|------------------------------------------------------------------|--|
| P84103 Splicing factor, arginine/serine-rich 3                   |  |
| Q02880 DNA topoisomerase 2-beta                                  |  |
| Q08211 ATP-dependent RNA helicase A                              |  |
| Q09666 Neuroblast differentiation-associated protein AHNAK       |  |
| Q10570 Cleavage and polyadenylation specificity factor subunit 1 |  |
| Q12905 Interleukin enhancer-binding factor 2                     |  |
| Q12906 Interleukin enhancer-binding factor 3                     |  |
| Q12996 Cleavage stimulation factor 77 kDa subunit                |  |
| Q13283 Ras GTPase-activating protein-binding protein 1           |  |
| Q14690 Protein RRP5 homolog                                      |  |
| Q14978 Nucleolar phosphoprotein p130                             |  |
| Q14980 Nuclear mitotic apparatus protein 1                       |  |
| Q15029 116 kDa U5 small nuclear ribonucleoprotein component      |  |
| Q15393 Splicing factor 3B subunit 3                              |  |
| Q15424 Scaffold attachment factor B1                             |  |
| Q16629 Splicing factor, arginine/serine-rich 7                   |  |
| Q5SSJ5 Heterochromatin protein 1-binding protein 3               |  |
| Q7Z2E3 Aprataxin                                                 |  |
| Q86V81 THO complex subunit 4                                     |  |
| Q8N684 Cleavage and polyadenylation specificity factor subunit 7 |  |
| Q8WXF1 Paraspeckle component 1                                   |  |
| Q92841 Probable ATP-dependent RNA helicase DDX17                 |  |
| Q96T60 Bifunctional polynucleotide phosphatase/kinase            |  |
| Q96T88 E3 ubiquitin-protein ligase UHRF1                         |  |
| Q9BQ67 Glutamate-rich WD repeat-containing protein 1             |  |
| Q9BQG0 Myb-binding protein 1A                                    |  |
| Q9BY77 Polymerase delta-interacting protein 3                    |  |
| Q9H0A0 N-acetyltransferase 10                                    |  |
| Q9H0S4 Probable ATP-dependent RNA helicase DDX47                 |  |
| Q9NQT4 Exosome complex exonuclease RRP46                         |  |
| Q9NR30 Nucleolar RNA helicase 2                                  |  |
| Q9NYF8 Bcl-2-associated transcription factor 1                   |  |
| Q9NZI8 Insulin-like growth factor 2 mRNA-binding protein 1       |  |
| Q9UKV3 Apoptotic chromatin condensation inducer in the nucleus   |  |
| Q9UMS4 Pre-mRNA-processing factor 19                             |  |
| Q9Y295 Developmentally-regulated GTP-binding protein 1           |  |
| Q9Y2W1 Thyroid hormone receptor-associated protein 3             |  |
| Q9Y5B9 FACT complex subunit SPT16                                |  |

Supplementary Table S4. Lists of proteins, extracted from the NEs pre-cleared with anti-Ku80 antibody, that relative levels didn't change or were enriched in the binding reactions conducted with a competitor.

| single stranded DNA probes                                                         | double stranded DNA probes                                 |
|------------------------------------------------------------------------------------|------------------------------------------------------------|
| O00425 Insulin-like growth factor 2 mRNA-binding protein 3                         | P21333 Filamin-A                                           |
| O00567 Nucleolar protein 5A                                                        | P23246 Splicing factor, proline- and glutamine-rich        |
| O00571 ATP-dependent RNA helicase DDX3X                                            | P46013 Antigen KI-67                                       |
| O43390 Heterogeneous nuclear ribonucleoprotein R                                   | Q09666 Neuroblast differentiation-associated protein AHNAK |
| O60506 Heterogeneous nuclear ribonucleoprotein Q                                   | Q5SSJ5 Heterochromatin protein 1-binding protein 3         |
| O75533 Splicing factor 3B subunit 1                                                | Q96PK6 RNA-binding protein 14                              |
| O76021 Ribosomal L1 domain-containing protein 1                                    | Q96T88 E3 ubiquitin-protein ligase UHRF1                   |
| P11387 DNA topoisomerase 1                                                         | P49916 DNA ligase 3                                        |
| P11388 DNA topoisomerase 2-alpha                                                   |                                                            |
| P11940 Polyadenylate-binding protein 1                                             |                                                            |
| P12956 ATP-dependent DNA helicase 2 subunit 1                                      |                                                            |
| P13010 ATP-dependent DNA helicase 2 subunit 2                                      |                                                            |
| P17480 Nucleolar transcription factor 1                                            |                                                            |
| P17844 Probable ATP-dependent RNA helicase DDX5                                    |                                                            |
| P18887 DNA repair protein XRCC1                                                    |                                                            |
| P21333 Filamin-A                                                                   |                                                            |
| P23246 Splicing factor, proline- and glutamine-rich                                |                                                            |
| P35579 Myosin-9                                                                    |                                                            |
| P38159 Heterogeneous nuclear ribonucleoprotein G                                   |                                                            |
| P46013 Antigen KI-67                                                               |                                                            |
| P60709 Actin, cytoplasmic 1                                                        |                                                            |
| P61978 Heterogeneous nuclear ribonucleoprotein K                                   |                                                            |
| P78527 DNA-dependent protein kinase catalytic subunit                              |                                                            |
| P84103 Splicing factor, arginine/serine-rich 3                                     |                                                            |
| Q02880 DNA topoisomerase 2-beta                                                    |                                                            |
| Q07666 KH domain-containing, RNA-binding, signal transduction-associated protein 1 |                                                            |
| Q07955 Splicing factor, arginine/serine-rich 1                                     |                                                            |
| Q09666 Neuroblast differentiation-associated protein AHNAK                         |                                                            |
| Q15233 Non-POU domain-containing octamer-binding protein                           |                                                            |
| Q15393 Splicing factor 3B subunit 3                                                |                                                            |
| Q15424 Scaffold attachment factor B1                                               |                                                            |
| Q16630 Cleavage and polyadenylation specificity factor subunit 6                   |                                                            |
| Q5SSJ5 Heterochromatin protein 1-binding protein 3                                 |                                                            |
| Q8N684 Cleavage and polyadenylation specificity factor subunit 7                   |                                                            |
| Q92804 TATA-binding protein-associated factor 2N                                   |                                                            |
| Q92841 Probable ATP-dependent RNA helicase DDX17                                   |                                                            |
| Q96PK6 RNA-binding protein 14                                                      |                                                            |
| Q9NR30 Nucleolar RNA helicase 2                                                    |                                                            |

|                                                  |  |
|--------------------------------------------------|--|
| Q9NY12 H/ACA ribonucleoprotein complex subunit 1 |  |
| Q9NYF8 Bcl-2-associated transcription factor 1   |  |

Supplementary Table S5. Unified ChIP dataset. ChIP data are expressed as a mean percent of input DNA (for RNAPII and PARP1), or as an input ratio of modified histone to total histone H3 for four independent experiments. The RNAPII/H3Ac ratio was calculated for each site tested by dividing the averaged RNAPII percent of input and the H3Ac/H3 level for all time points.

| Probe       | Gene   | Localization | Mean ChIP Data (for time points) |       |       |       | SD (for time points) |      |      |      |
|-------------|--------|--------------|----------------------------------|-------|-------|-------|----------------------|------|------|------|
|             |        |              | 0h                               | 1h    | 6h    | 24h   | 0h                   | 1h   | 6h   | 24h  |
| RNAPII      | HBB    | Promoter     | 1.68                             | 2.04  | 1.96  | 1.58  | 1.27                 | 1.18 | 0.95 | 1.12 |
| RNAPII      | HNRNPK | Promoter     | 11.14                            | 11.85 | 11.33 | 12.21 | 1.35                 | 1.20 | 0.34 | 0.92 |
| RNAPII      | TUBB6  | Promoter     | 8.33                             | 12.82 | 12.27 | 11.59 | 1.53                 | 1.56 | 2.26 | 1.81 |
| RNAPII      | HSP70  | Promoter     | 15.89                            | 19.42 | 21.20 | 24.15 | 4.99                 | 2.34 | 2.53 | 4.53 |
| RNAPII      | HNRNPH | Promoter     | 5.85                             | 7.22  | 6.72  | 8.13  | 0.68                 | 1.05 | 1.70 | 2.48 |
| RNAPII      | RPS7   | Promoter     | 9.03                             | 9.66  | 10.59 | 11.11 | 2.39                 | 1.97 | 0.94 | 1.49 |
| RNAPII      | EGR1   | Promoter     | 6.58                             | 13.10 | 8.38  | 7.89  | 0.19                 | 1.80 | 1.08 | 0.30 |
| RNAPII      | GAPDH  | Promoter     | 9.58                             | 10.77 | 10.67 | 9.95  | 1.48                 | 1.27 | 1.18 | 1.50 |
| H3Ac/H3     | HBB    | Promoter     | 0.03                             | 0.03  | 0.02  | 0.03  | 0.03                 | 0.02 | 0.01 | 0.02 |
| H3Ac/H3     | HNRNPK | Promoter     | 0.59                             | 0.51  | 0.63  | 0.61  | 0.11                 | 0.09 | 0.10 | 0.07 |
| H3Ac/H3     | TUBB6  | Promoter     | 0.57                             | 0.73  | 0.70  | 0.67  | 0.07                 | 0.30 | 0.15 | 0.24 |
| H3Ac/H3     | HSP70  | Promoter     | 0.49                             | 0.29  | 0.45  | 0.49  | 0.07                 | 0.09 | 0.05 | 0.17 |
| H3Ac/H3     | HNRNPH | Promoter     | 0.46                             | 0.72  | 0.63  | 0.64  | 0.20                 | 0.15 | 0.16 | 0.06 |
| H3Ac/H3     | RPS7   | Promoter     | 0.43                             | 0.48  | 0.48  | 0.40  | 0.06                 | 0.18 | 0.09 | 0.14 |
| H3Ac/H3     | EGR1   | Promoter     | 0.13                             | 0.19  | 0.09  | 0.13  | 0.04                 | 0.03 | 0.03 | 0.04 |
| H3Ac/H3     | GAPDH  | Promoter     | 0.62                             | 0.59  | 0.89  | 0.71  | 0.16                 | 0.38 | 0.55 | 0.32 |
| H3K4me3/H3  | HBB    | Promoter     | 2.42                             | 3.40  | 3.24  | 3.26  | 0.44                 | 0.89 | 0.43 | 0.90 |
| H3K4me3/H3  | HNRNPK | Promoter     | 2.97                             | 3.68  | 3.89  | 3.88  | 0.89                 | 0.87 | 0.45 | 0.50 |
| H3K4me3/H3  | TUBB6  | Promoter     | 4.36                             | 4.85  | 5.66  | 6.10  | 2.25                 | 1.22 | 1.81 | 1.04 |
| H3K4me3/H3  | HSP70  | Promoter     | 3.43                             | 4.37  | 5.09  | 5.02  | 1.57                 | 0.69 | 1.64 | 0.70 |
| H3K4me3/H3  | HNRNPH | Promoter     | 3.98                             | 5.97  | 5.57  | 6.21  | 1.33                 | 1.45 | 1.56 | 0.90 |
| H3K4me3/H3  | RPS7   | Promoter     | 4.33                             | 5.74  | 6.40  | 6.30  | 1.94                 | 0.86 | 1.34 | 0.96 |
| H3K4me3/H3  | EGR1   | Promoter     | 5.09                             | 6.23  | 6.90  | 7.03  | 3.06                 | 1.77 | 3.03 | 0.98 |
| H3K4me3/H3  | GAPDH  | Promoter     | 4.73                             | 6.43  | 7.68  | 7.60  | 2.42                 | 0.64 | 2.41 | 0.41 |
| H3K27me3/H3 | HBB    | Promoter     | 1.46                             | 1.38  | 1.52  | 1.61  | 0.32                 | 0.28 | 0.28 | 0.25 |
| H3K27me3/H3 | HNRNPK | Promoter     | 0.41                             | 0.34  | 0.37  | 0.39  | 0.08                 | 0.07 | 0.06 | 0.05 |
| H3K27me3/H3 | TUBB6  | Promoter     | 0.49                             | 0.41  | 0.44  | 0.49  | 0.03                 | 0.06 | 0.08 | 0.14 |
| H3K27me3/H3 | HSP70  | Promoter     | 0.31                             | 0.29  | 0.34  | 0.36  | 0.26                 | 0.20 | 0.20 | 0.39 |
| H3K27me3/H3 | HNRNPH | Promoter     | 0.21                             | 0.21  | 0.26  | 0.22  | 0.09                 | 0.03 | 0.05 | 0.11 |
| H3K27me3/H3 | RPS7   | Promoter     | 0.37                             | 0.24  | 0.27  | 0.37  | 0.05                 | 0.02 | 0.05 | 0.10 |
| H3K27me3/H3 | EGR1   | Promoter     | 0.60                             | 0.52  | 0.70  | 0.65  | 0.08                 | 0.08 | 0.09 | 0.21 |
| H3K27me3/H3 | GAPDH  | Promoter     | 0.21                             | 0.18  | 0.24  | 0.22  | 0.01                 | 0.03 | 0.11 | 0.15 |

|                 |      |            |            |      |             |             |             |             |             |             |             |
|-----------------|------|------------|------------|------|-------------|-------------|-------------|-------------|-------------|-------------|-------------|
| Heterochromatin | PARP | Intergenic | Intergenic | 2.60 | 2.70        | 2.80        | 2.76        | 0.71        | 0.07        | 0.02        | 0.12        |
|                 | PARP | RHO        | intron_2   | 2.81 | 3.27        | 4.21        | 3.74        | 0.12        | 0.10        | 0.81        | 0.67        |
|                 | PARP | RHO        | exon_5     | 3.19 | 2.81        | 3.68        | 3.07        | 0.55        | 0.14        | 0.14        | 0.33        |
|                 | PARP | HBB        | Promoter   | 1.82 | 2.51        | 3.06        | 1.97        | 0.35        | 0.27        | 0.69        | 0.13        |
|                 | Mean |            |            |      | <b>2.60</b> | <b>2.82</b> | <b>3.44</b> | <b>2.88</b> | <b>0.58</b> | <b>0.33</b> | <b>0.63</b> |
| Euchromatin     | PARP | HNRNPK     | Promoter   | 1.88 | 1.69        | 1.99        | 1.66        | 0.33        | 0.28        | 0.08        | 0.29        |
|                 | PARP | TUBB6      | Promoter   | 1.14 | 1.29        | 1.30        | 1.06        | 0.27        | 0.12        | 0.39        | 0.33        |
|                 | PARP | HSP70      | Promoter   | 1.30 | 1.42        | 1.11        | 1.45        | 0.10        | 0.34        | 0.41        | 0.01        |
|                 | PARP | HNRNPH     | Promoter   | 0.21 | 0.43        | 0.37        | 0.33        | 0.09        | 0.11        | 0.03        | 0.15        |
|                 | PARP | RPS7       | Promoter   | 0.97 | 0.84        | 0.94        | 0.74        | 0.37        | 0.23        | 0.37        | 0.13        |
|                 | PARP | EGR1       | Promoter   | 0.44 | 0.43        | 0.69        | 0.56        | 0.17        | 0.29        | 0.15        | 0.10        |
|                 | PARP | GAPDH      | Promoter   | 0.93 | 0.99        | 1.54        | 1.03        | 0.18        | 0.15        | 0.38        | 0.11        |
|                 | Mean |            |            |      | <b>0.98</b> | <b>1.01</b> | <b>1.14</b> | <b>0.97</b> | <b>0.55</b> | <b>0.49</b> | <b>0.54</b> |

|        | Mean RNAPII | Mean H3Ac/H3 | RNAPII/H3Ac RATIO |
|--------|-------------|--------------|-------------------|
| HBB    | 1.82        | 0.03         | 69                |
| HNRNPK | 11.63       | 0.58         | 20                |
| TUBB6  | 11.25       | 0.67         | 17                |
| HSP70  | 20.16       | 0.43         | 47                |
| HNRNPH | 6.98        | 0.61         | 11                |
| RPS7   | 10.10       | 0.45         | 23                |
| EGR1   | 8.99        | 0.13         | 67                |
| GAPDH  | 10.24       | 0.70         | 15                |
